# Supplementary material for: New anthracene derivatives integrating high mobility and strong emission
Source: Royal Society of Chemistry journal article supplement (doi:10.1039/c8tc05145c), 2018-01-01
Supplement: c8tc05145c1.pdf [file c8tc05145c1.pdf]

## **New anthracene derivatives integrating high mobility and strong emission**

Jinfeng Li, Lei Zheng, Lingjie Sun, Chenguang Li, Xiaotao Zhang\* & Wenping Hu\*

Tianjin Key Laboratory of Molecular Optoelectronic Sciences, Department of Chemistry, School of Science, Tianjin University & Collaborative Innovation Centre of Chemical Science and Engineering (Tianjin), Tianjin 300072, China.

\*Correspondence: [zhangxt@tju.edu.cn](mailto:zhangxt@tju.edu.cn); [huwp@tju.edu.cn](mailto:huwp@tju.edu.cn)

|                              |                                                                                         |              |
|------------------------------|-----------------------------------------------------------------------------------------|--------------|
| <b>Table of contents</b>     |                                                                                         |              |
| <b>Experimental Section.</b> |                                                                                         | <b>S2-S3</b> |
| <b>Figure S1</b>             | Film device and charge transport properties of Compound Ant-Th-Ph and Compound Ant-ThPh | <b>S4</b>    |
| <b>Figure S2</b>             | Stokes shift                                                                            | <b>S5</b>    |
| <b>Ref.</b>                  |                                                                                         | <b>S6</b>    |

## Experimental Section

### General methods

All reagents and chemicals were obtained from commercial sources and used without further purification. <sup>1</sup>H NMR spectra were taken in CDCl<sub>3</sub> with TMS (δ 0.00 ppm) as internal standard at room temperature and were recorded on Bruker 400 NMR spectrometer. UV-Vis spectra were obtained on SHIMADZU UV-3600 UV-Vis-NIR spectrophotometer. Photoluminescence (PL) spectra were recorded on a HITACHI F-7000 spectrofluorometer. Thermal gravimetric analysis (TGA) was carried out on a METTLER TOLEDO TGA2 apparatus with a scanning rate of 10 °C/min. Differential scanning calorimetry was performed on Diamond DSC apparatus under a dry nitrogen flow at a rate of 10 °C/min. Absolute quantum yield measurement (LabSphereR, FluoroMax-4, HORIBA JobinYvon, PLQY software package) was used for powder sample. In this experimental setup, it is possible to measure the Photoluminescence Quantum Yields (PLQY) via using the integrating sphere in combination with a commercial fluorimeter. Emission spectra including the scattering region of excitation light were recorded for both blank and test samples, and these spectra were corrected with instrumental factors to calculate the quantum yield. Cyclic voltammetry (CV) measurements were conducted using a CHI660C electrochemistry station with tetrabutylammonium hexafluorophosphate (Bu<sub>4</sub>NPF<sub>6</sub>) as electrolyte (0.001 M in dry CH<sub>2</sub>Cl<sub>2</sub>). The working, counter and reference electrodes were Glassy carbon, Pt wire and Ag/AgCl, respectively. OFET characteristics were recorded by a Keithley 4200 SCS and Micromanipulator 6150 probe station.

### Synthesis of Compound **Ant-Th-Ph**<sup>1</sup>

Anthracen-2-ylboronic acid (1.00 g, 4.5 mmol), 2-bromo-5-phenylthiophene (1.29 g, 5.4 mmol), Na<sub>2</sub>CO<sub>3</sub> (3.17 g, 2.0 M) and Pd(PPh<sub>3</sub>)<sub>4</sub> (0.21 g, 0.18 mmol) was added to a 100 mL flask two-neck bottle under N<sub>2</sub>. 30 ml of toluene and 15 mL H<sub>2</sub>O were added and then heated to 90 °C and stirred for 24 hours. The system was then filtered, washed successively with triethylamine, dichloromethane, water, and ethanol and purified by sublimation. Ant-Th-Ph was obtained as a yellow solid, with a yield of 72.6% (1.1 g). <sup>1</sup>H NMR (400 MHz, CDCl<sub>3</sub>): δ [ppm] 8.5 (s, 1H), 8.47

(s, 1H), 8.31 (s, 1H), 8.10 (d, 1H), 8.06 (t, 2H), 7.84 (d, 1H), 7.74 (d, 2H), 7.56 (d, 1H), 7.53 (t, 2H), 7.46 (m, 3H), 7.36 (t, 1H). MS (EI) m/z: 336 [M<sup>+</sup>]; Anal. calculated for C<sub>24</sub>H<sub>16</sub>S (%): C: 85.68, H: 4.79. Experimental: C: 85.58%, H: 4.64%.

#### Compound **Ant-ThPh**<sup>1</sup>

Anthracen-2-ylboronic acid (1.00 g, 4.5 mmol), 2-bromobenzo[b]thiophene (1.15 g, 5.4 mmol), Na<sub>2</sub>CO<sub>3</sub> (3.17 g, 2.0 M) and Pd(PPh<sub>3</sub>)<sub>4</sub> (0.21 g, 0.18 mmol) was added to a 100 mL flask two-neck bottle under N<sub>2</sub>. 30 ml of toluene and 15 mL H<sub>2</sub>O were added and then heated to 90 °C and stirred for 24 hours. The system was then filtered, washed successively with triethylamine, dichloromethane, water, and ethanol and purified by sublimation. Ant-ThPh was obtained as a yellow solid, with a yield of 78.69% (1.1 g). <sup>1</sup>HNMR (400 MHz, CDCl<sub>3</sub>): δ [ppm] 8.43 (s, 1H), 8.38 (s, 1H), 8.26 (s, 1H), 8.02 (d, 1H), 7.96 (m, 2H), 7.82 (m, 2H), 7.71 (d, 1H), 7.70 (s, 1H), 7.43 (m, 2H), 7.29 (m, 2H). MS (EI) m/z: 310 [M<sup>+</sup>]; Anal. calculated for C<sub>24</sub>H<sub>16</sub>S (%): C: 85.13, H: 4.55. Experimental: C: 85.23%, H: 4.41%.

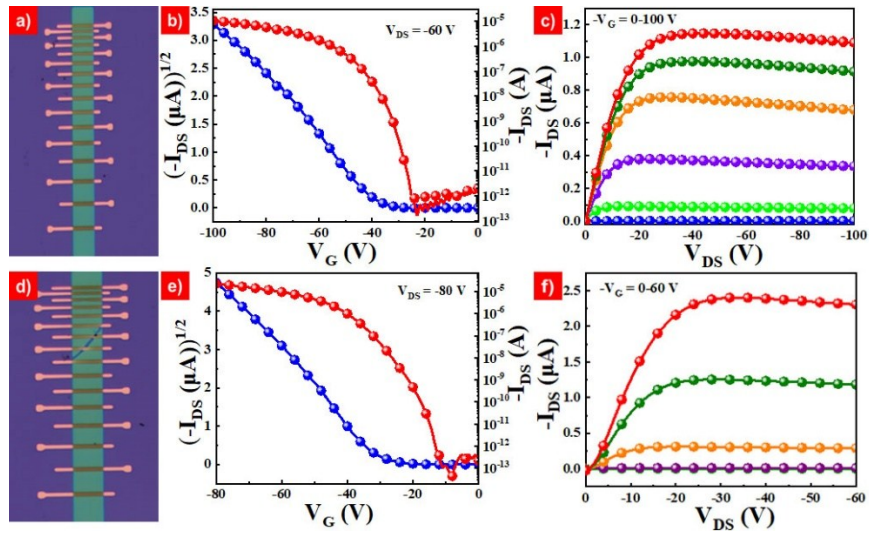

**Figure S1** a) and d) Thin film-based transistor of Ant-Th-Ph (the ratio of W/L of best data is 9/1) and Ant-ThPh (the ratio of W/L of best data is 9/1). b) and c) Typical transfer and output curves of thin film-based transistor of Ant-Th-Ph. e) and f) Typical transfer and output curves of thin film-based transistor of Ant-ThPh.

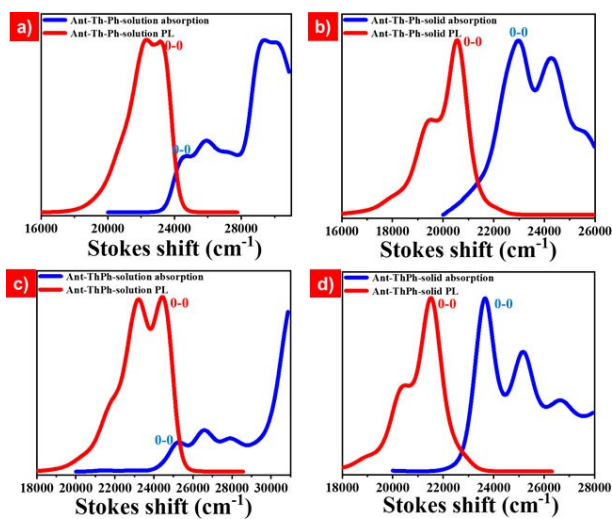

Figure S2 Stokes shift (blue absorption, red PL). a) Ant-Th-Ph solution b) Ant-Th-Ph solid c) Ant-ThPh solution d) Ant-ThPh solid

Reference:

1. T Komori, H Nakanotani, T Yasuda, C Adachi. *J. Mater. Chem. C*, 2014, **2**, 4918-4921
